# Supplementary material for: Efficacy of high zinc biofortified wheat in improvement of micronutrient status, and prevention of morbidity among preschool children and women - a double masked, randomized, controlled trial
Source: Springer Nature journal article supplement (doi:10.1186/s12937-018-0391-5), 2018-09-15
Supplement: MOESM1 [file 25659304]

**Additional file Table S1** Zinc content of the study wheat flour

| S. No. | Study Flour codes | Batch wise zinc content (mg/kg) of wheat flour |                          |                           |                      |                          |                          |                          |                          |                         |                           |                           |                           |                           |                           |                           |                           |                           |                          |
|--------|-------------------|------------------------------------------------|--------------------------|---------------------------|----------------------|--------------------------|--------------------------|--------------------------|--------------------------|-------------------------|---------------------------|---------------------------|---------------------------|---------------------------|---------------------------|---------------------------|---------------------------|---------------------------|--------------------------|
|        |                   | 1<br>(15<br>Jan<br>2014)                       | 2<br>(19<br>May<br>2014) | 3<br>( 27<br>Jun<br>2014) | 4<br>(2 Aug<br>2014) | 5<br>(28<br>Aug<br>2014) | 6<br>(25<br>Sep<br>2014) | 7<br>(25<br>Oct<br>2014) | 8<br>(10<br>Nov<br>2014) | 9<br>(9<br>Dec<br>2014) | 10<br>(20<br>Dec<br>2014) | 11<br>(19<br>Jan<br>2015) | 12<br>(13<br>Feb<br>2015) | 13<br>(26<br>Feb<br>2015) | 14<br>(17<br>Mar<br>2015) | 15<br>(17<br>Apr<br>2015) | 16<br>(25<br>May<br>2015) | 17<br>(2<br>July<br>2015) | 18<br>(3<br>Aug<br>2015) |
| 1      | A77582167         | 32.4                                           | 36.6                     | 26                        | 27.7                 | 29                       | 28.2                     | 32                       | 28                       | 32.4                    | 33.9                      | 31.8                      | 29.8                      | 30                        | 28.8                      | 30.2                      | 29.3                      | 28.9                      | 27.8                     |
| 2      | B77879005         | 34.8                                           | 36.1                     | 31.8                      | 34.3                 | 32.1                     | 36.3                     | 32.2                     | 32.9                     | 32.9                    | 29.5                      | 32                        | 32.4                      | 25.2                      | 32.6                      | 29.8                      | 33.9                      | 34.1                      | 31.8                     |
| 3      | C78827329         | 32.2                                           | 33.9                     | 25.8                      | 34.7                 | 29.2                     | 31.1                     | 31.4                     | 30.5                     | 22.9                    | 30.5                      | 29.2                      | 27.2                      | 31.1                      | 30.5                      | 26.4                      | 32.9                      | 33.3                      | 29.2                     |
| 4      | D74642767         | 26.4                                           | 23.8                     | 29.5                      | 33.5                 | 31.2                     | 31.6                     | 21.3                     | 29.8                     | 26.8                    | 32.1                      | 30                        | 32.8                      | 30.7                      | 39.3                      | 28.7                      | 31.6                      | 31.6                      | 30.3                     |
| 5      | E83530433         | 19.7                                           | 20.4                     | 19.8                      | 20.4                 | 19.7                     | 18.9                     | 18.8                     | 20.3                     | 18.8                    | 22.1                      | 22.2                      | 20.6                      | 20.4                      | 20.5                      | 20.6                      | 20.8                      | 22.6                      | 20.5                     |
| 6      | F81213325         | 19.6                                           | 21.7                     | 20.7                      | 22.9                 | 19.5                     | 18.8                     | 18.6                     | 19.3                     | 19.8                    | 18.2                      | 25.1                      | 21.4                      | 20                        | 19.4                      | 19.8                      | 21.1                      | 22.2                      | 20.9                     |
| 7      | G86155432         | 20                                             | 24.2                     | 20.3                      | 20.3                 | 21.2                     | 19.6                     | 18.8                     | 21.3                     | 20                      | 20.9                      | 23.2                      | 21.6                      | 19.8                      | 25.5                      | 19.4                      | 21.8                      | 22.6                      | 22.4                     |
| 8      | H87240917         | 20.5                                           | 24.1                     | 27.1                      | 21.2                 | 21.4                     | 19.7                     | 19                       | 18.7                     | 21.5                    | 24.9                      | 22.9                      | 22.7                      | 20.6                      | 19.1                      | 21.4                      | 21.9                      | 22.3                      | 20.5                     |

**Table S2** Phytic acid content of the study wheat flour

| S. No. | Study Flour codes | Batch wise Phytic ACID (% by mass) of wheat flour |                          |                           |                         |                          |                          |                          |                          |                         |                           |                           |                           |                           |                           |                           |                           |                           |                          |
|--------|-------------------|---------------------------------------------------|--------------------------|---------------------------|-------------------------|--------------------------|--------------------------|--------------------------|--------------------------|-------------------------|---------------------------|---------------------------|---------------------------|---------------------------|---------------------------|---------------------------|---------------------------|---------------------------|--------------------------|
|        |                   | 1<br>(15<br>Jan<br>2014)                          | 2<br>(19<br>May<br>2014) | 3<br>( 27<br>Jun<br>2014) | 4<br>(2<br>Aug<br>2014) | 5<br>(28<br>Aug<br>2014) | 6<br>(25<br>Sep<br>2014) | 7<br>(25<br>Oct<br>2014) | 8<br>(10<br>Nov<br>2014) | 9<br>(9<br>Dec<br>2014) | 10<br>(20<br>Dec<br>2014) | 11<br>(19<br>Jan<br>2015) | 12<br>(13<br>Feb<br>2015) | 13<br>(26<br>Feb<br>2015) | 14<br>(17<br>Mar<br>2015) | 15<br>(17<br>Apr<br>2015) | 16<br>(25<br>May<br>2015) | 17<br>(2<br>July<br>2015) | 18<br>(3<br>Aug<br>2015) |
| 1      | 81213325          | 0.3                                               | 0.4                      | 0.3                       | 0.3                     | 0.4                      | 0.2                      | 0.3                      | 0.5                      | 0.3                     | 0.3                       | 0.3                       | 0.3                       | 0.4                       | 0.3                       | 0.4                       | 0.2                       | 0.2                       | 0.6                      |
| 2      | 86155432          | 0.4                                               | 0.4                      | 0.3                       | 0.2                     | 0.4                      | 0.3                      | 0.3                      | 0.4                      | 0.4                     | 0.4                       | 0.3                       | 0.3                       | 0.3                       | 0.4                       | 0.4                       | 0.3                       | 0.3                       | 0.4                      |
| 3      | 83530433          | 0.3                                               | 0.3                      | 0.3                       | 0.2                     | 0.4                      | 0.2                      | 0.3                      | 0.3                      | 0.4                     | 0.3                       | 0.3                       | 0.2                       | 0.4                       | 0.3                       | 0.5                       | 0.3                       | 0.2                       | 0.5                      |
| 4      | 87240917          | 0.4                                               | 0.3                      | 0.5                       | 0.3                     | 0.3                      | 0.2                      | 0.3                      | 0.5                      | 0.4                     | 0.4                       | 0.3                       | 0.3                       | 0.4                       | 0.3                       | 0.5                       | 0.2                       | 0.2                       | 0.4                      |
| 5      | 74642767          | 0.4                                               | 0.4                      | 0.4                       | 0.3                     | 0.4                      | 0.2                      | 0.3                      | 0.4                      | 0.4                     | 0.3                       | 0.3                       | 0.4                       | 0.4                       | 0.5                       | 0.4                       | 0.2                       | 0.4                       | 0.5                      |
| 6      | 78827329          | 0.5                                               | 0.4                      | 0.6                       | 0.3                     | 0.3                      | 0.3                      | 0.5                      | 0.5                      | 0.4                     | 0.4                       | 0.3                       | 0.4                       | 0.4                       | 0.3                       | 0.5                       | 0.3                       | 0.4                       | 0.5                      |
| 7      | 77879005          | 0.6                                               | 0.4                      | 0.3                       | 0.3                     | 0.4                      | 0.3                      | 0.4                      | 0.4                      | 0.4                     | 0.4                       | 0.3                       | 0.3                       | 0.4                       | 0.4                       | 0.4                       | 0.4                       | 0.3                       | 0.5                      |
| 8      | 77582167          | 0.5                                               | 0.6                      | 0.3                       | 0.4                     | 0.4                      | 0.2                      | 0.4                      | 0.5                      | 0.4                     | 0.3                       | 0.3                       | 0.3                       | 0.4                       | 0.4                       | 0.5                       | 0.3                       | 0.3                       | 0.6                      |
